# Supplementary material
Source: PubMed Central journal article supplement (PMC2423811)
Supplement: NIHMS49336-supplement-Tables_Figures.pdf [file NIHMS49336-supplement-Tables_Figures.pdf]

### Supplementary Table 1s

Peptic peptides from NCap32L. Each peptide was identified by either ESI-MS/MS or MS<sup>E</sup> with its m/z, charge state, sequence number, mass, and peptide sequence. The reporter peptide is in bold. The peptides in Figure 2 and Figure 5/6 are indicated with a star (\*). Other selected peptides shown in Figures 1,2s are labeled with letters (a-o).

| Ion observed m/z | Charge State(+) | HXMS Data | Sequence Number | Mass (Da)     | Peptide Sequence            |
|------------------|-----------------|-----------|-----------------|---------------|-----------------------------|
| 563.7            | 2               |           | 2-11            | 1125.4        | GQQPGKVLGDQ                 |
| 1126.7           | 1               |           |                 |               |                             |
| 1090.4           | 2               | *         | 2-60            | 2178.8        | GQQPGKVLGDQRREPOG           |
| 727.0            | 3               | *         | 2-63            | 2178.0        | GQQPGKVLGDQRREPOGLSE        |
| 774.3            | 3               |           | 2-65            | 2319.9        | GQQPGKVLGDQRREPOGLSEAA      |
| 523.7            | 2               |           | 66-73           | 1045.4        | RWNSKENL                    |
| 594.7            | 2               | *         | 64-73           | 1187.4        | AARWNSKENL                  |
| 1188.6           | 1               |           |                 |               |                             |
| 704.0            | 1               |           | 68-73           | 703.0         | NSKENL                      |
| 677.3            | 2               |           | 72-84           | 1352.6        | NLLAGPSENDPNL               |
| 1126.5           | 1               |           | 74-84           | 1125.5        | LAGPSENDPNL                 |
| 637.3            | 2               | a         | 74-85           | 1272.6        | LAGPSENDPNLF                |
| 449.3            | 1               | b         | 85-88           | 448.3         | FVAL                        |
| 580.4            | 1               |           | 86-90           | 579.4         | VALYD                       |
| 626.4            | 1               |           | 87-91           | 625.4         | ALYDF                       |
| 444.1            | 1               |           | 89-91           | 443.1         | YDF                         |
| 1029.6           | 2               |           | 89-106          | 2057.2        | YDFVASGDNTLSITKGEK          |
| 776.4            | 1               | c         | 92-99           | 775.4         | VASGDNTL                    |
| 811.5            | 1               |           | 91-98           | 810.5         | FVASGDNT                    |
| 923.5            | 1               |           | 91-99           | 922.5         | FVASGDNTL                   |
| 817.0            | 2               |           | 92-107          | 1632.0        | VASGDNTLSITKGEKL            |
| 890.5            | 2               |           | 91-107          | 1779.0        | FVASGDNTLSITKGEKL           |
| 986.9            | 3               |           | 92-118          | 2957.7        | VASGDNTLSITKGEKLRVLGYNHNGEW |
| 875.6            | 1               |           | 100-107         | 874.6         | SITKGEKL                    |
| 438.3            | 2               | d         |                 |               |                             |
| 1101.2           | 2               |           | 100-118         | 2200.4        | SITKGEKLRVLGYNHNGEW         |
| 734.5            | 3               | e         |                 |               |                             |
| 570.8            | 2               | f         | 107-116         | 1139.6        | LRVLGYNHNG                  |
| 672.8            | 2               | g         | 108-118         | 1343.6        | RVLGYNHNGEW                 |
| 996.5            | 3               |           | 119-145         | 2986.5        | CEAQTKNQGQWVPSNYITPVNSLEKHS |
| <b>809.9</b>     | <b>2</b>        | *         | <b>119-133</b>  | <b>1617.8</b> | <b>CEAQTKNQGQWVPSN</b>      |
| 933.6            | 1               |           | 120-128         | 932.6         | EAQTKNQGQ                   |
| 693.9            | 2               |           | 121-133         | 1385.8        | AQTKNQGQWVPSN               |
| 793.3            | 1               |           | 134-140         | 792.3         | YITPVNS                     |

|        |   |   |         |        |                                         |
|--------|---|---|---------|--------|-----------------------------------------|
| 906.5  | 1 |   | 134-141 | 905.5  | YITPVNSL                                |
| 934.5  | 2 | h | 142-157 | 1867.0 | EKHSWYHGPPVSRNAAE                       |
| 623.4  | 3 |   |         |        |                                         |
| 798.4  | 2 |   | 141-153 | 1594.8 | LEKHSWYHGPPVSR                          |
| 1379.2 | 2 |   | 132-155 | 2756.4 | SNYITPVNSLEKHSWYHGPPVSRNA               |
| 919.8  | 3 | i |         |        |                                         |
| 635.9  | 2 |   | 158-169 | 1269.8 | YLLSSGINGSFL                            |
| 881.5  | 1 |   | 160-168 | 880.5  | LSSGINGSF                               |
| 816.5  | 2 |   | 170-184 | 1631.0 | VRESESSPGQRSISL                         |
| 873.0  | 2 | j | 169-184 | 1744.0 | LVRESESSPGQRSISL                        |
| 582.4  | 3 |   |         |        |                                         |
| 1006.9 | 4 |   | 169-203 | 4023.6 | LVRESESSPGQRSISLRYEGRVYHYRINT<br>ASDGKL |
| 1149.7 | 2 | k | 185-203 | 2297.4 | RYEGRVYHYRINTASDGKL                     |
| 836.0  | 2 |   | 193-207 | 1670.0 | YRINTASDGKLYVSS                         |
| 974.6  | 1 |   | 204-211 | 973.6  | YVSESERF                                |
| 487.8  | 2 | l |         |        |                                         |
| 651.9  | 2 |   | 204-214 | 1301.8 | YVSESERFNTL                             |
| 923.9  | 2 |   | 204-228 | 1845.8 | YVSESERFNTLAELVHHHSTVADGL               |
| 1485.8 | 1 |   | 215-228 | 1484.8 | AELVHHHSTVADGL                          |
| 743.4  | 2 | m |         |        |                                         |
| 643.4  | 2 | n | 217-228 | 1284.8 | LVHHHSTVADGL                            |
| 685.7  | 2 |   | 224-236 | 1369.4 | VADGLITTLHYPA                           |
| 629.4  | 3 |   | 230-245 | 1885.2 | TTLHYPAPKRNKPTVY                        |
| 1308.7 | 2 |   | 229-251 | 2615.4 | ITTLHYPAPKRNKPTVYGVSPNY                 |
| 1058.9 | 3 | o | 229-255 | 3173.7 | ITTLHYPAPKRNKPTVYGVSPNYDKWE             |
| 663.3  | 2 |   | 246-255 | 1193.5 | GVSPNYDKWE                              |

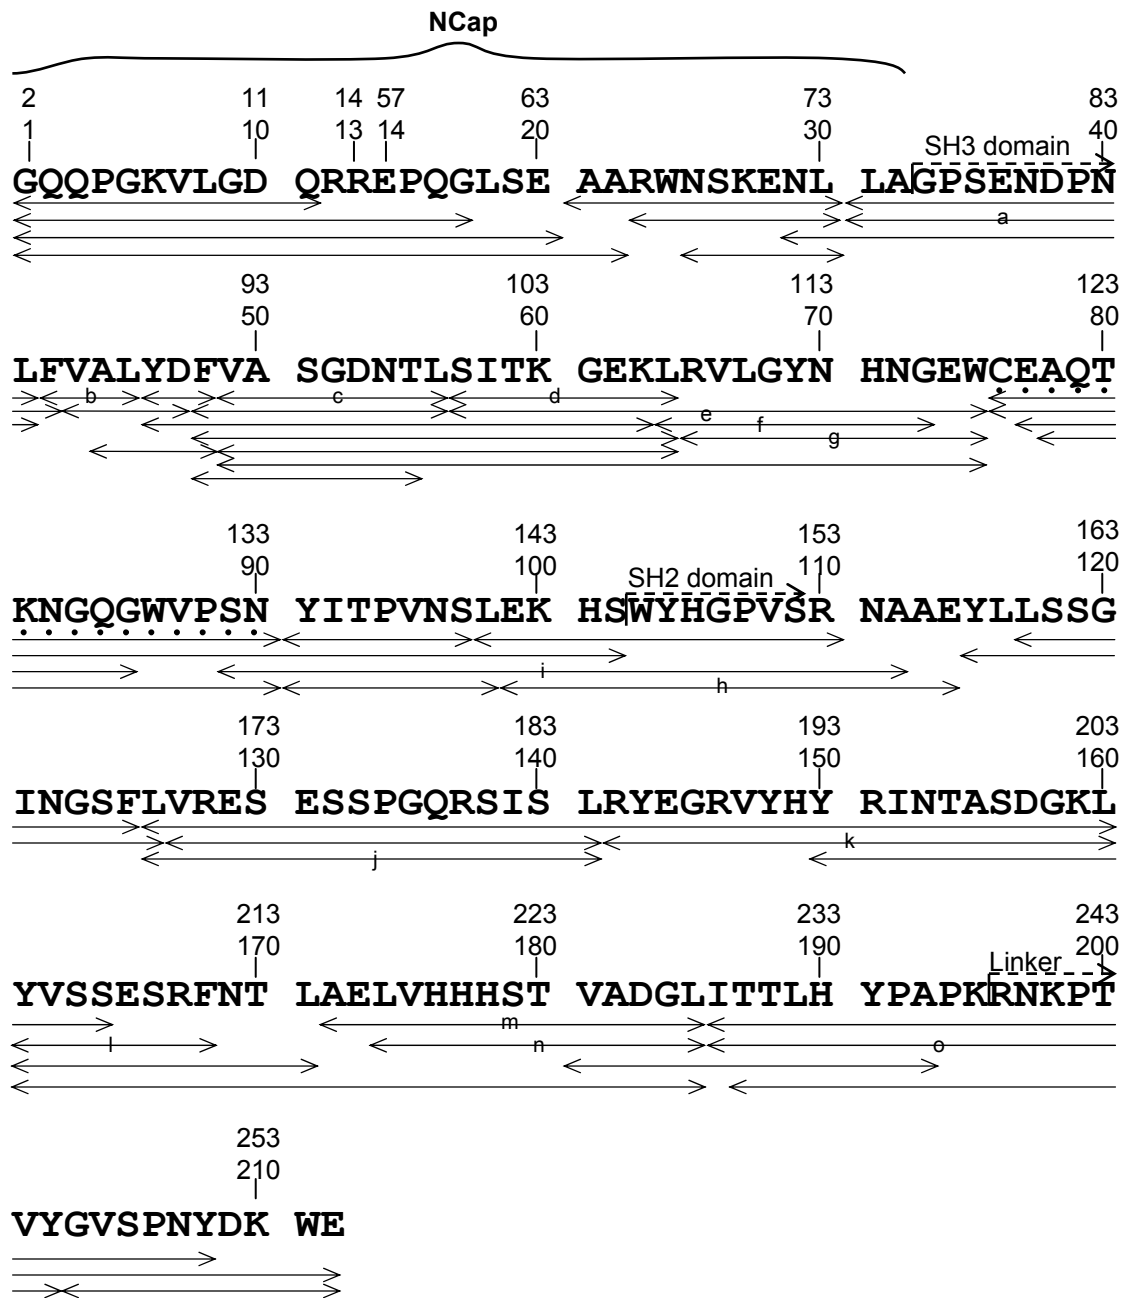

### Supplementary Figure 1s

Peptic peptides of NCap32L. Each peptide that was identified by either ESI-MS/MS or MS<sup>E</sup> is indicated by a line under the protein sequence (see also Supplementary Table 1s). The reporter peptide is labeled with dots under the sequence. The domains of each construct are indicated with arrows. The sequence is numbered for the Abl protein (top) which has deletions in the NCap [Ref 16] and for the Abl core construct (bottom) as prepared in Sf9 cells.

## Supplementary Figure 2s

The relative deuterium uptake and peak width change of the selected peptides (panel a~o) of Abl SH32, SH32L, NCap32, NCap32L.

m/z= 637.3 (+2)

SH3: LAGPSENDPNLF Max=9

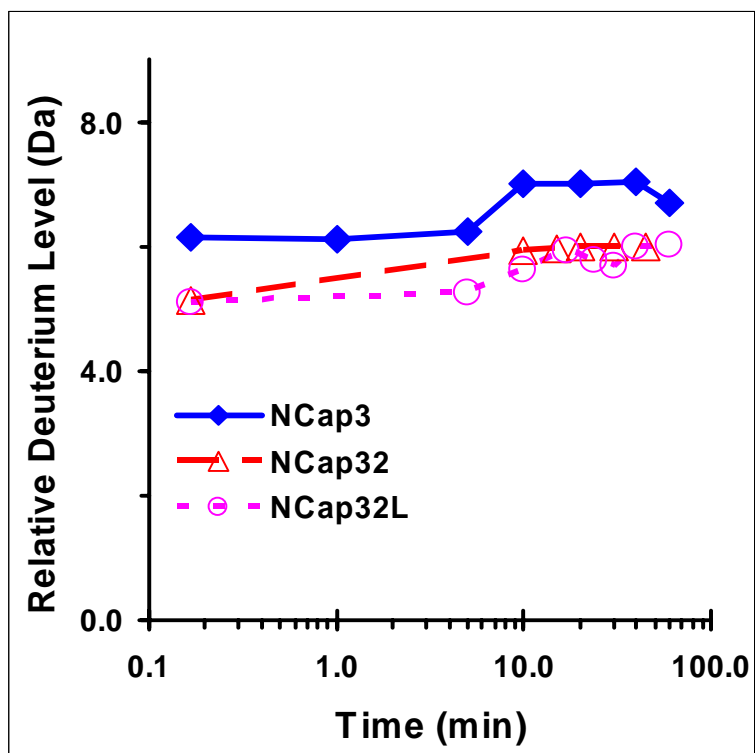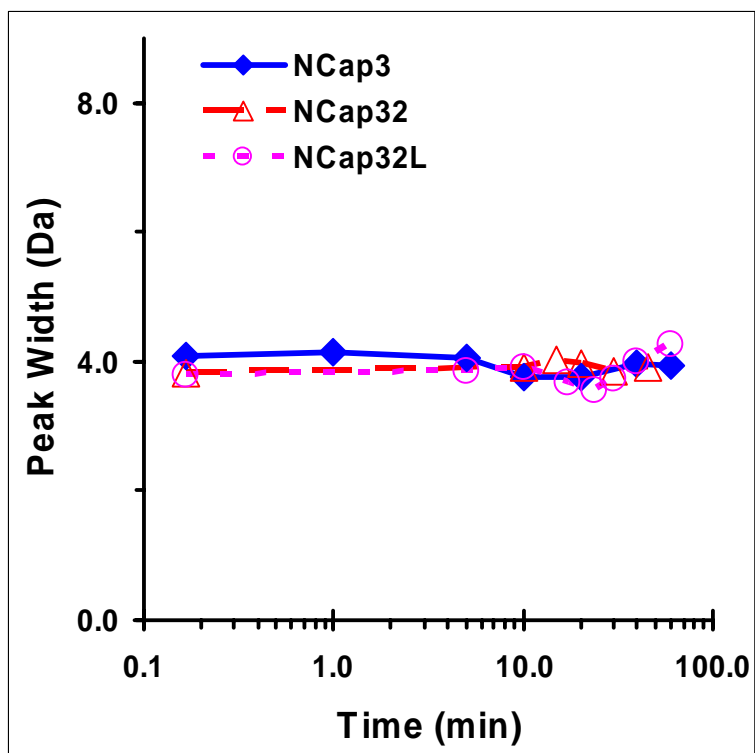

a

m/z= 449.3 (+1)  
SH3: FVAL Max=3

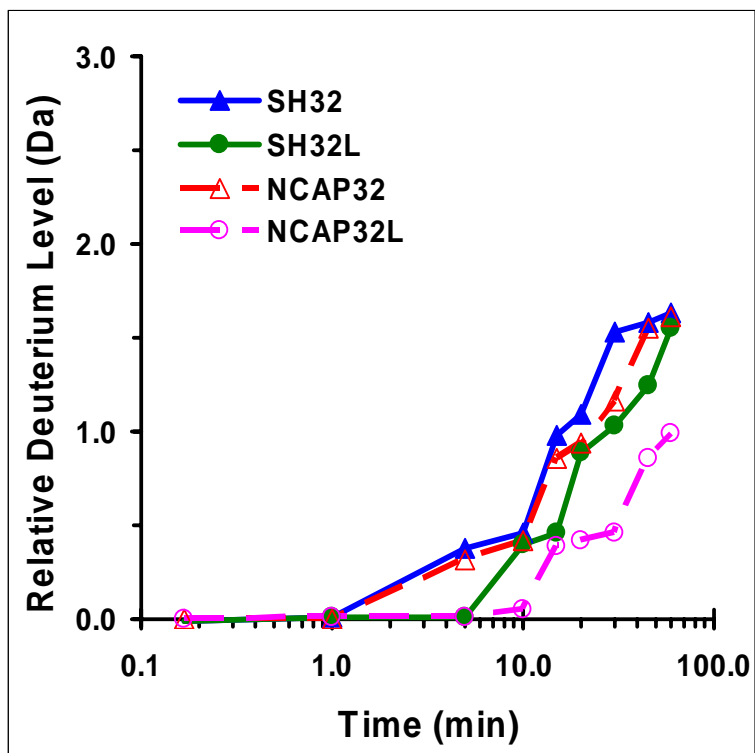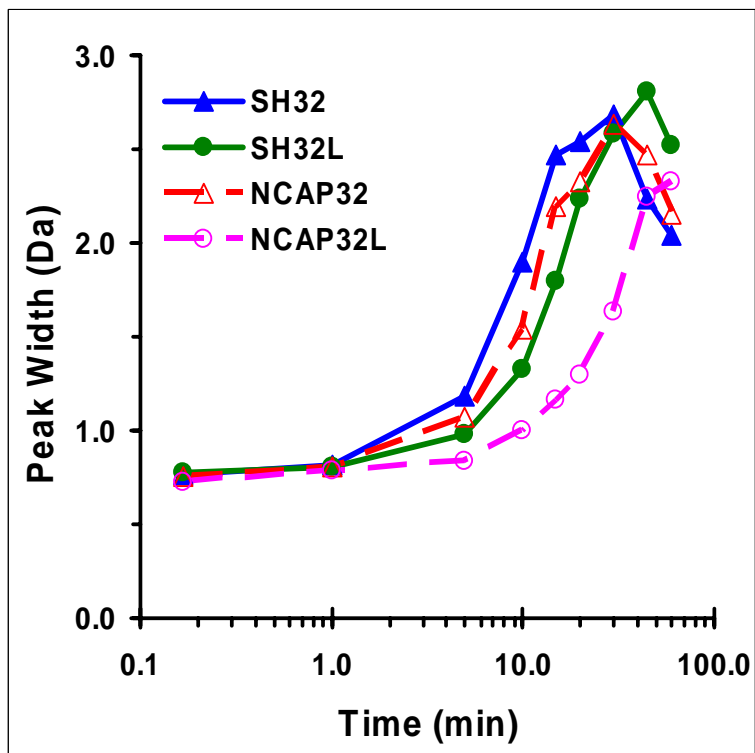

b

m/z= 776.4 (+1)

SH3: VASGDNTL Max=7

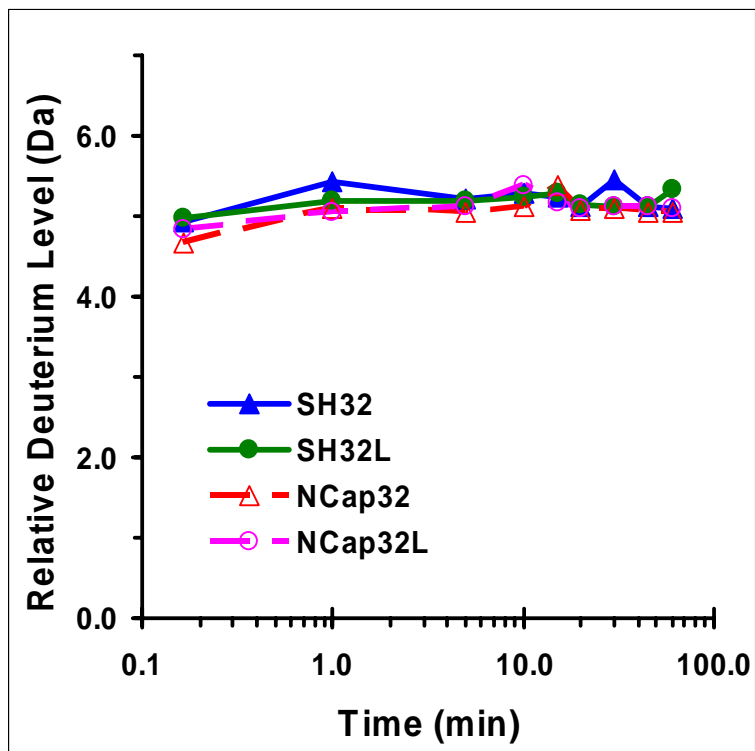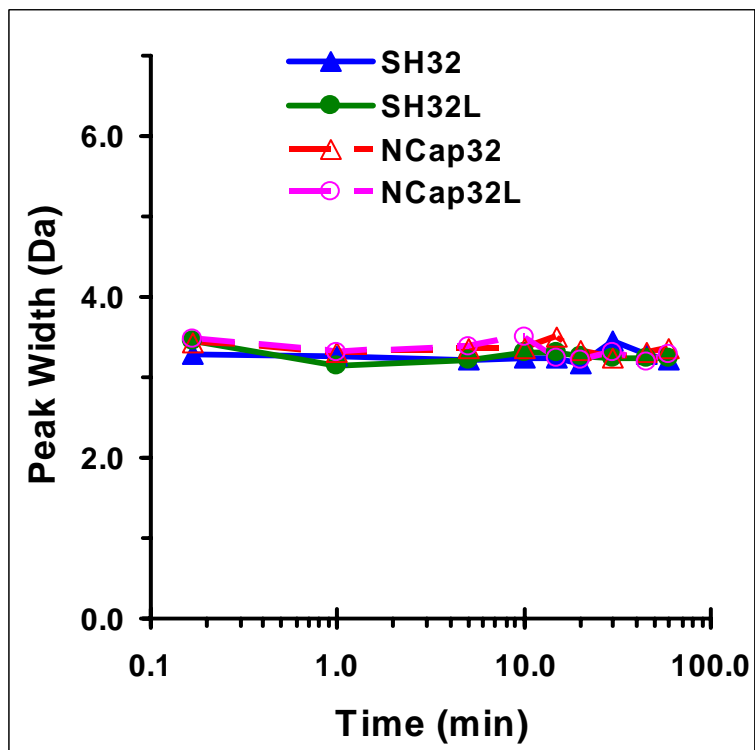

C

m/z= 438.3 (+2)

SH3: SITKGEKL Max=7

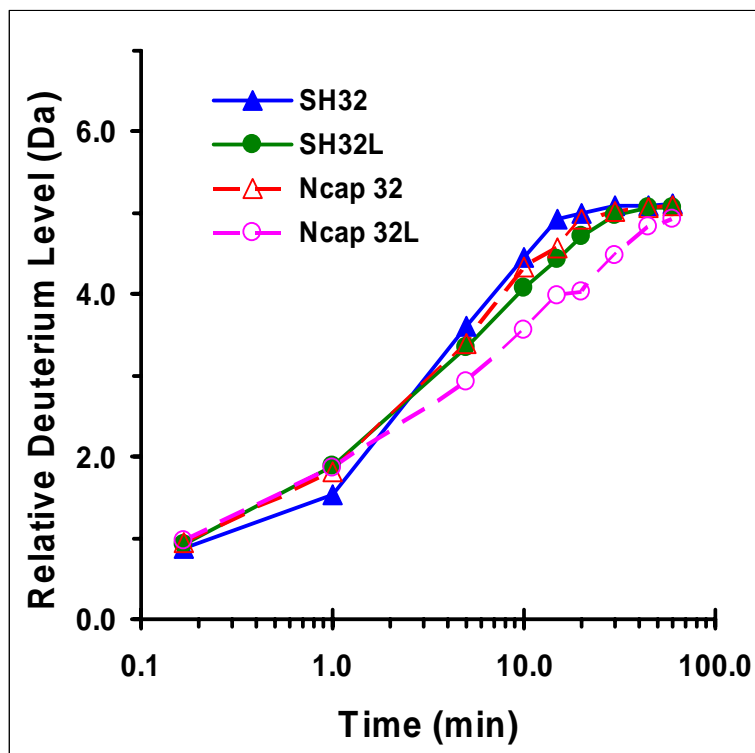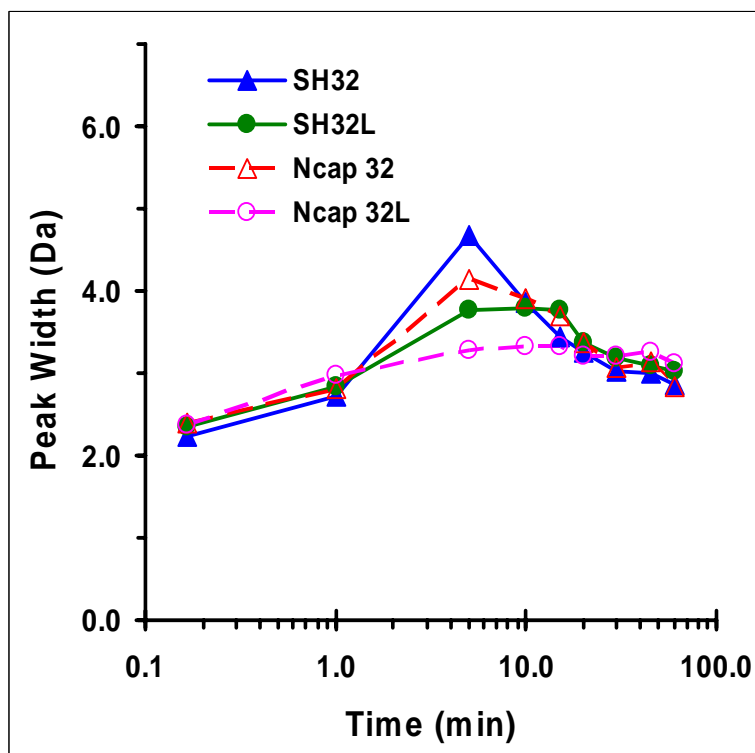

d



m/z= 734.5 (+3)

SH3: SITKGEKLRVVLGYNHNGEW

Max=19

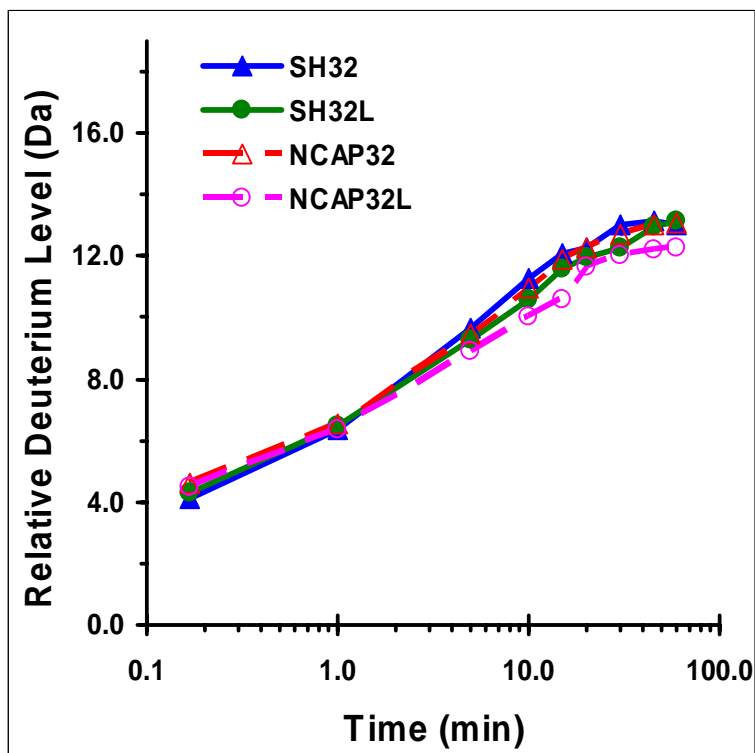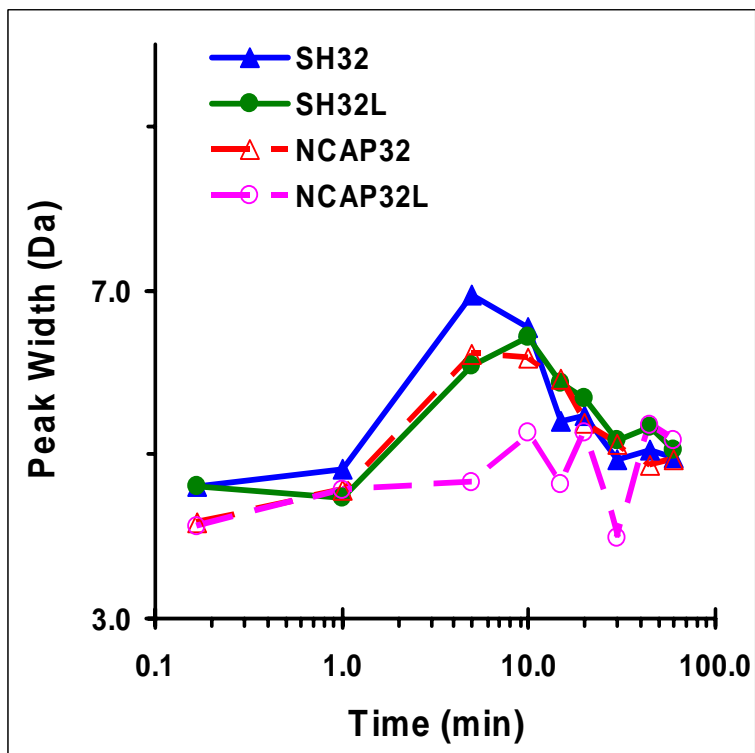

m/z= 570.8 (+2)

SH3: LRVLGYNHNG Max=10

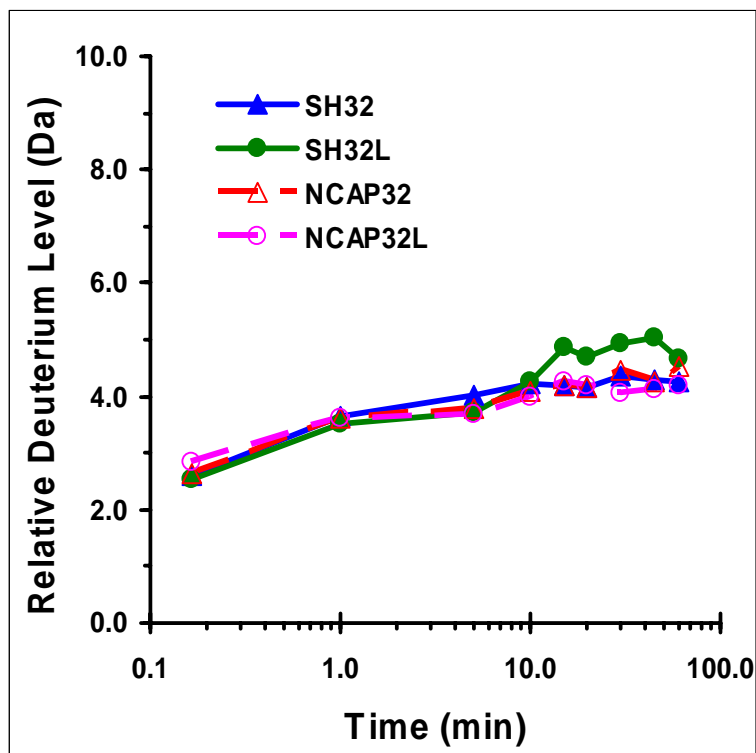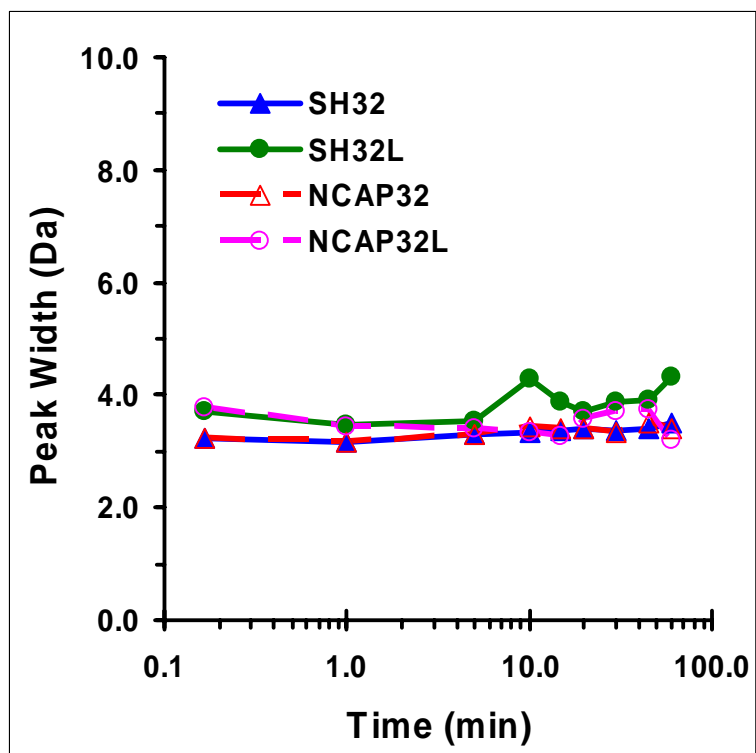

m/z= 672.8 (+2)

SH3: RVLGYNHNGEW Max=10

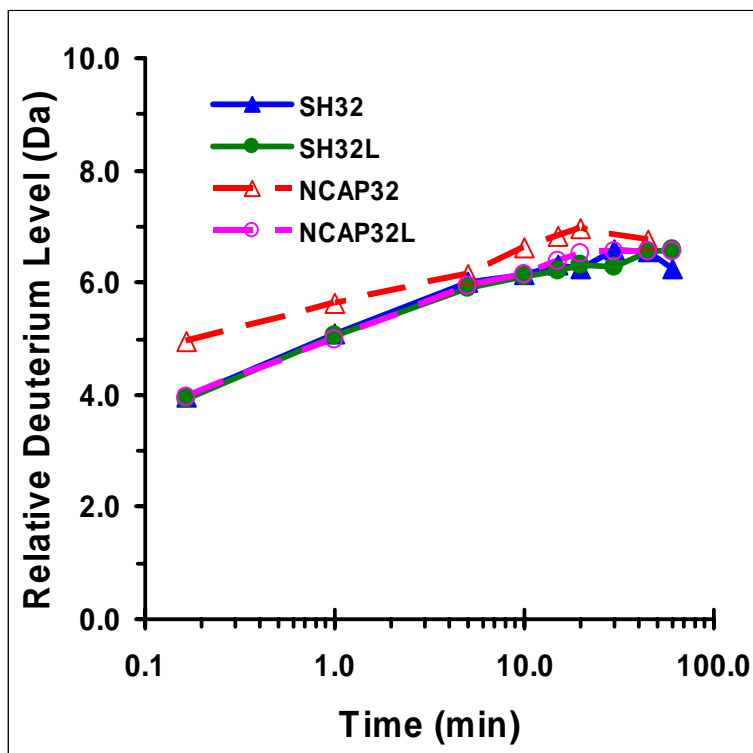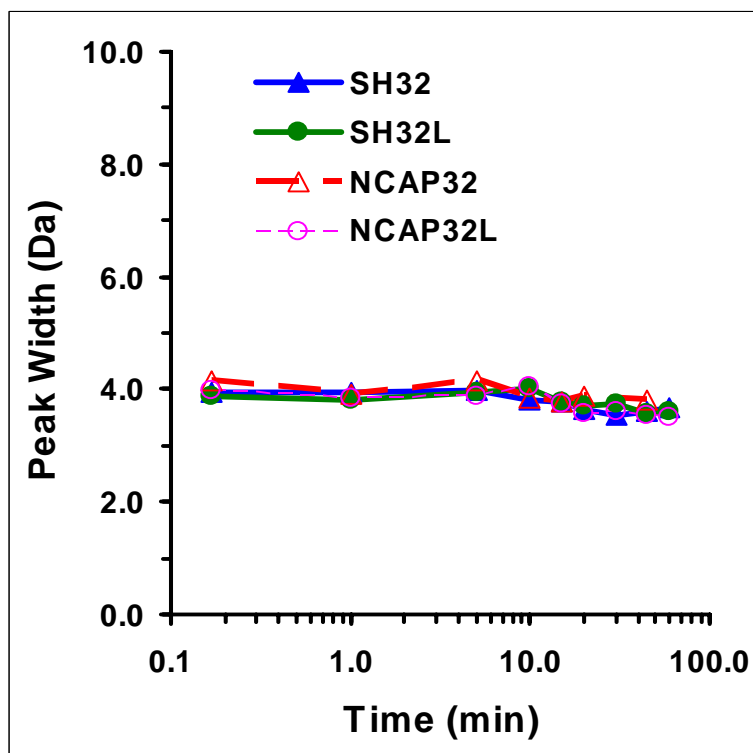

m/z= 934.5 (+2)

SH2: EKHSWYHGPVSRNAAE

Max=15

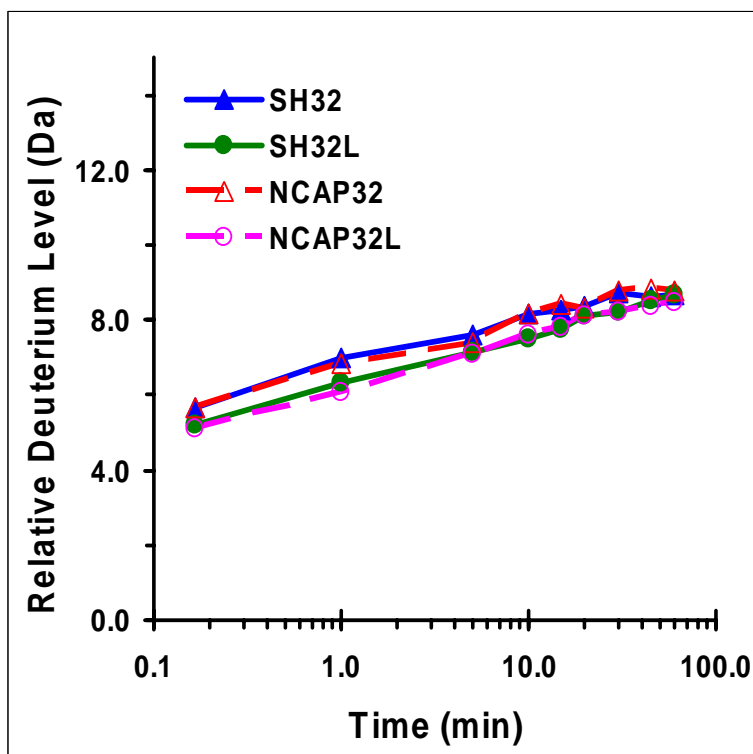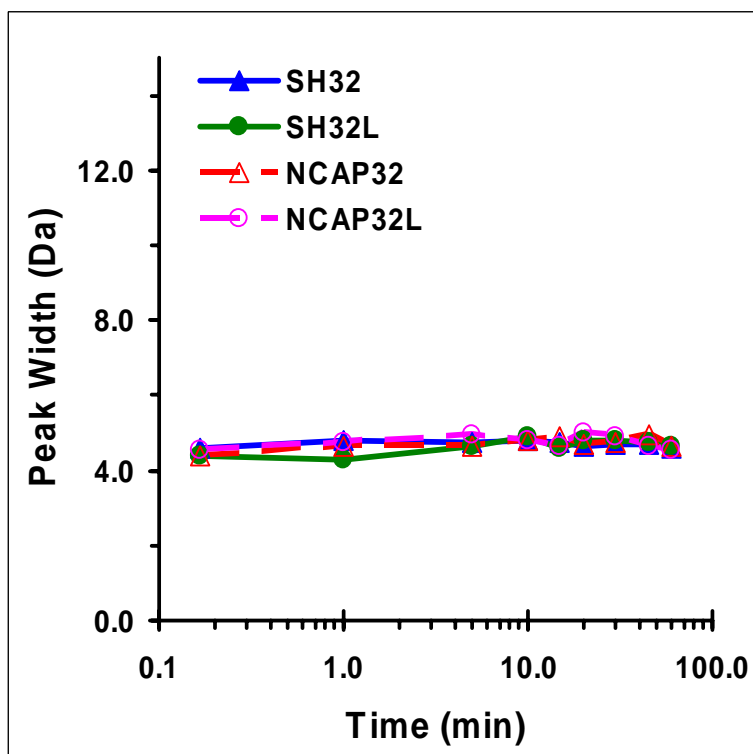

h

m/z= 919.8 (+3)

SH3-SH2: SNYITPVNSLEKHSWYHGPVSRNA

Max=22

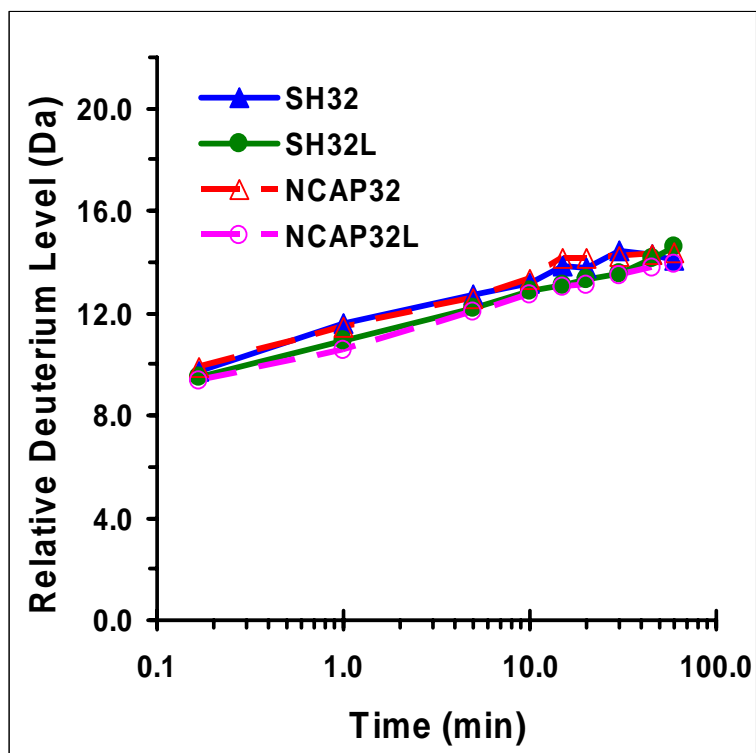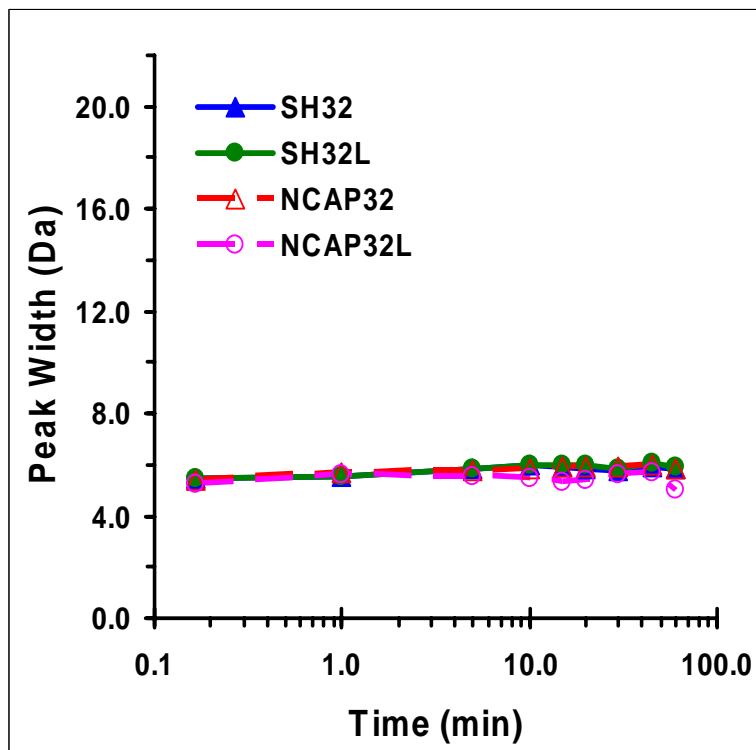

m/z= 873.0 (+2)

SH2: LVRESESSPGQRSISL Max=16

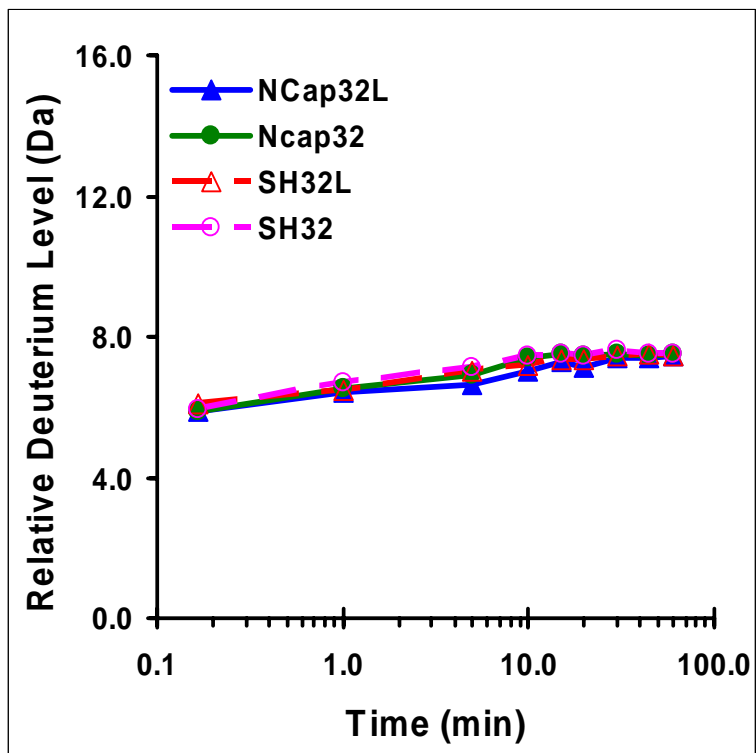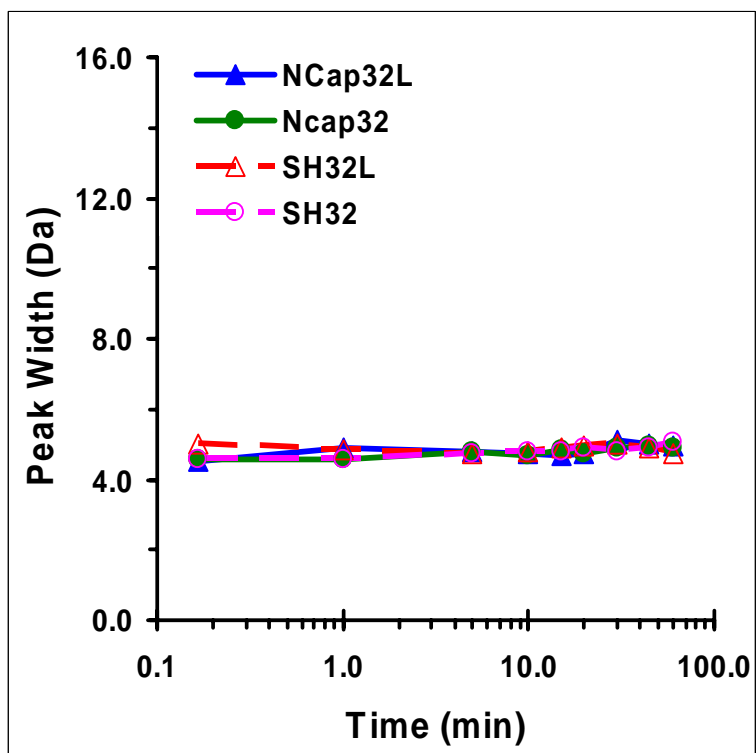

m/z= 1149.7 (+2)

SH2: RYEGRVYHYRINTASDGKL

Max=20

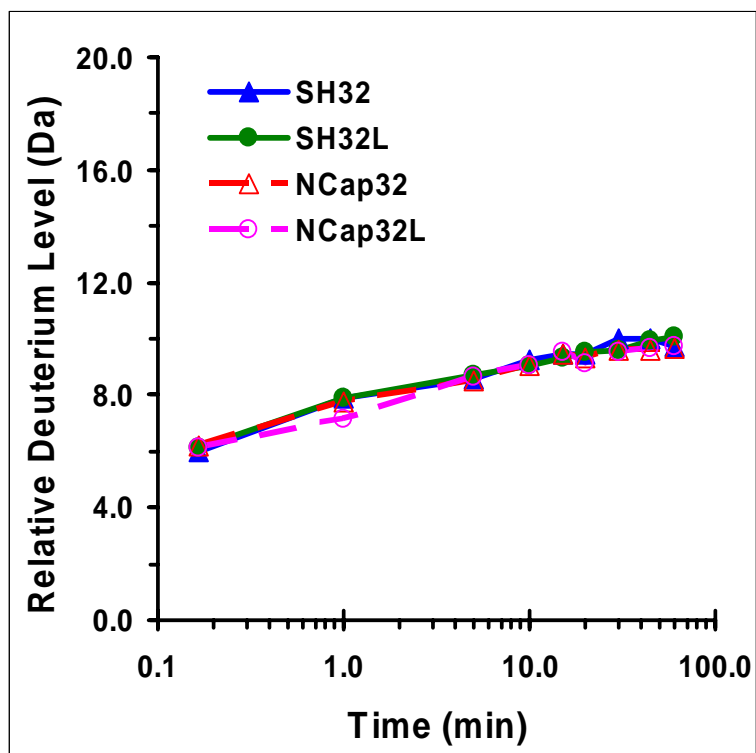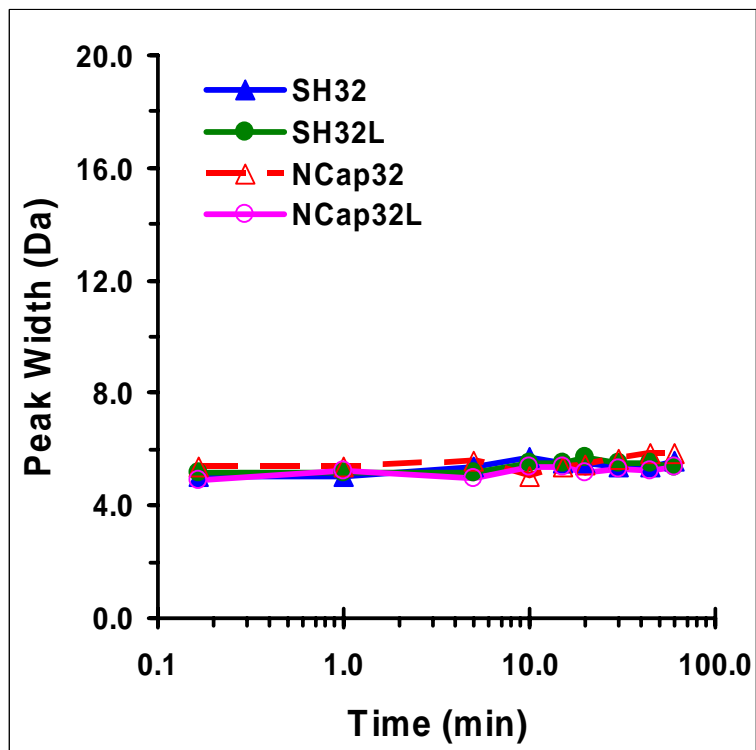

k

m/z= 487.8 (+2)

SH2: YVSSESRF

Max=8

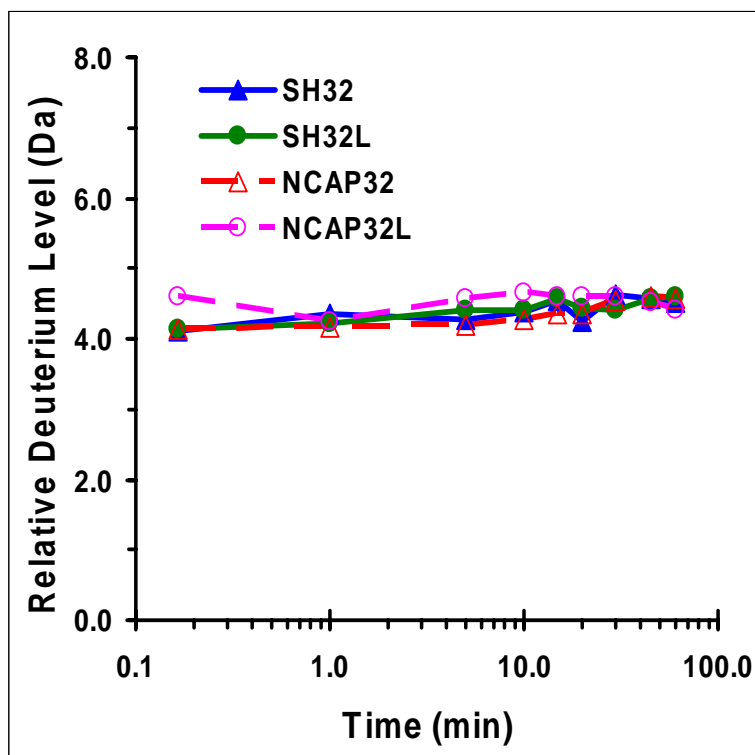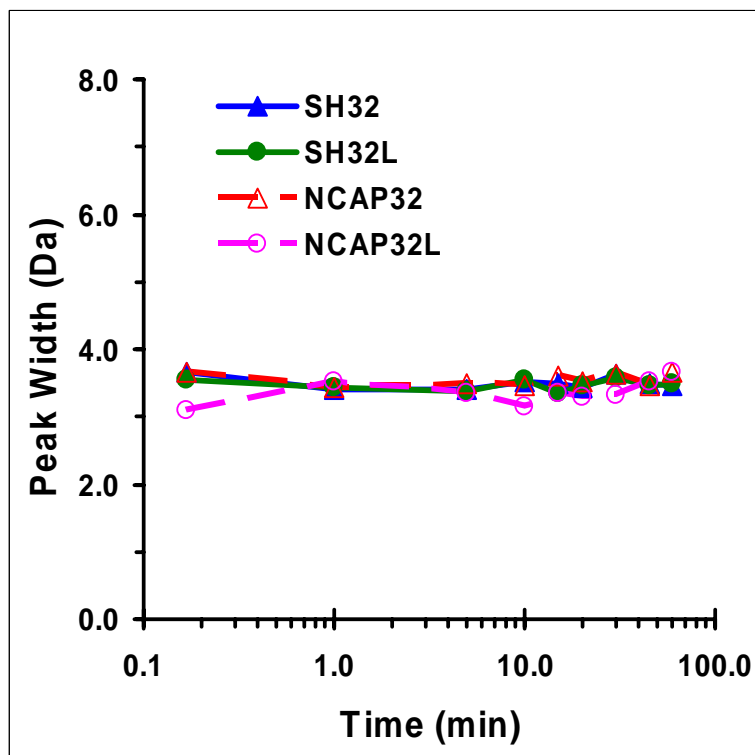



m/z= 743.4 (+2)

SH2: AELVHHHSTVADGL

Max=13

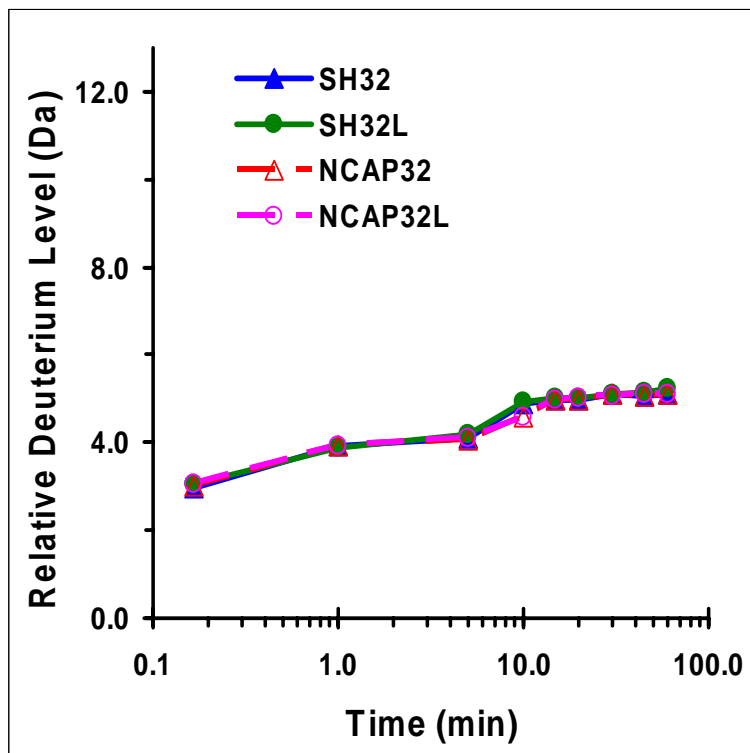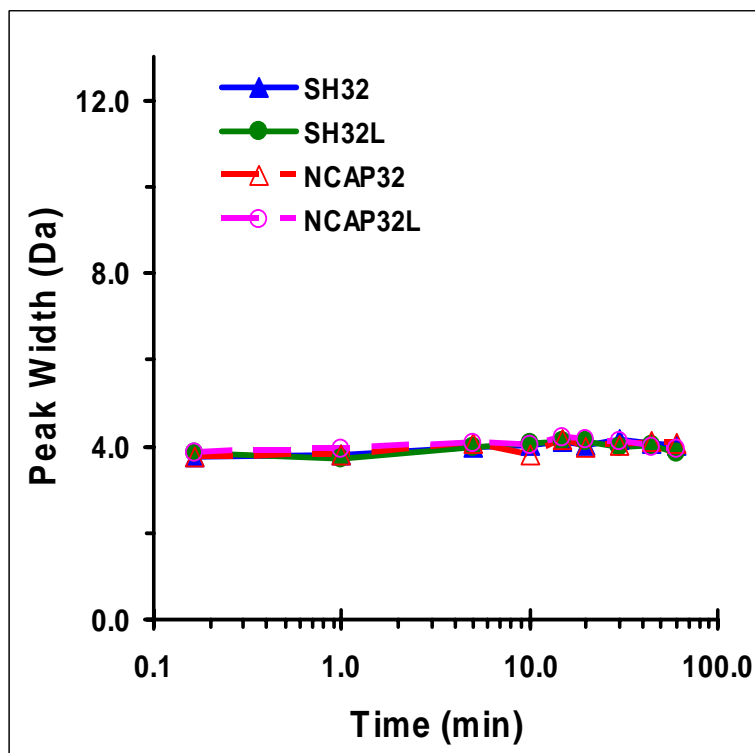

m/z= 643.4 (+2)

SH2: LVHHHSTVADGL

Max=11

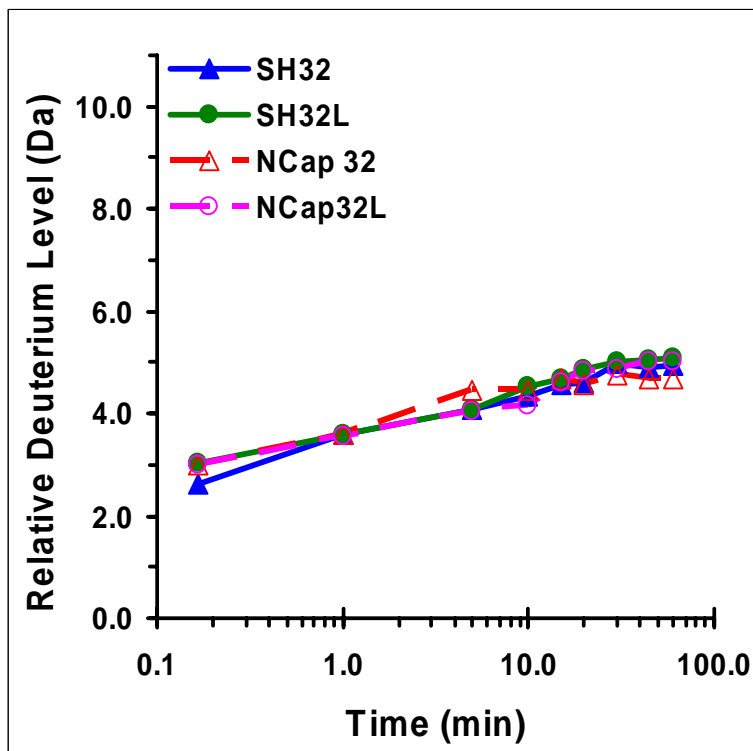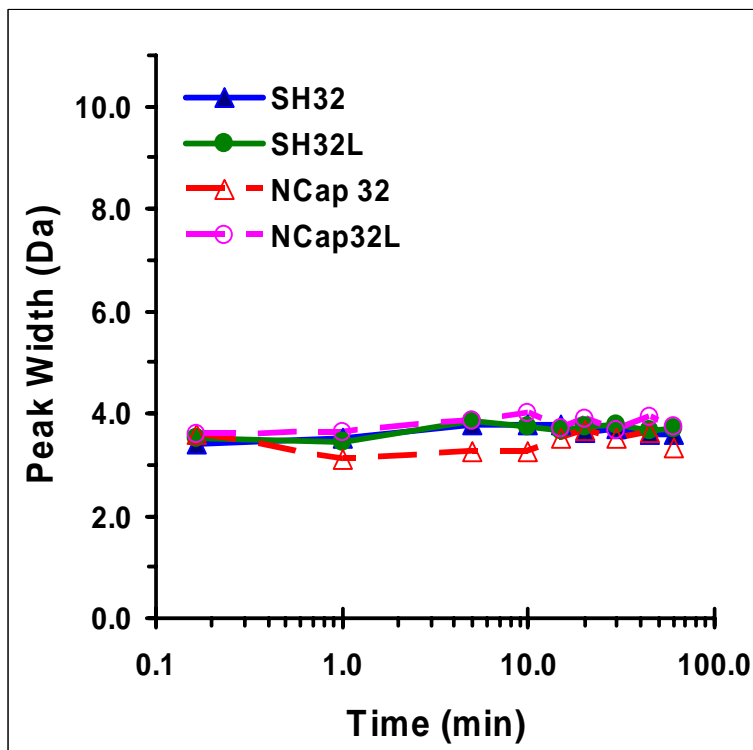

m/z= 1058.9 (+3)

SH2-kinase Linker: ITTLHYPAPKRNKPTVYGVSPNYDKWE

Max=23

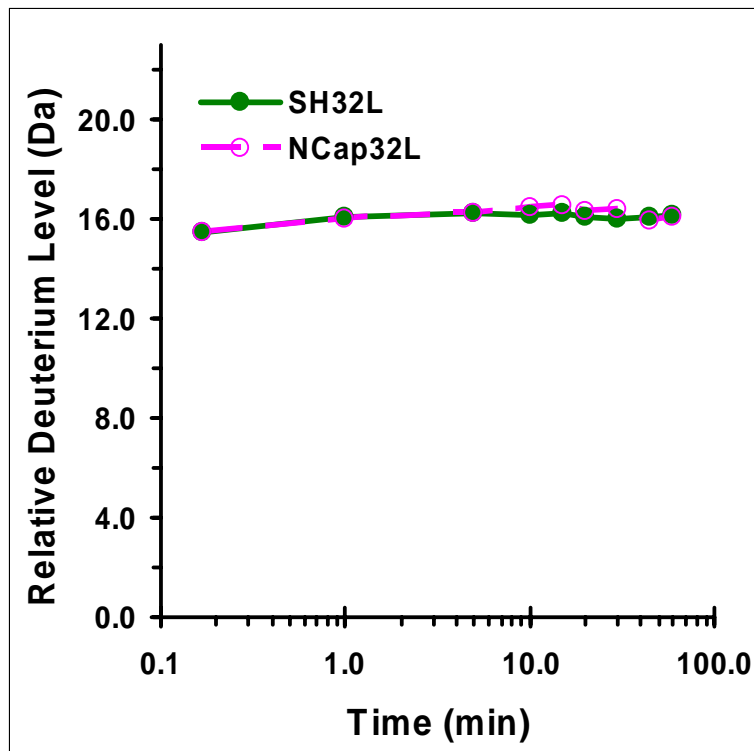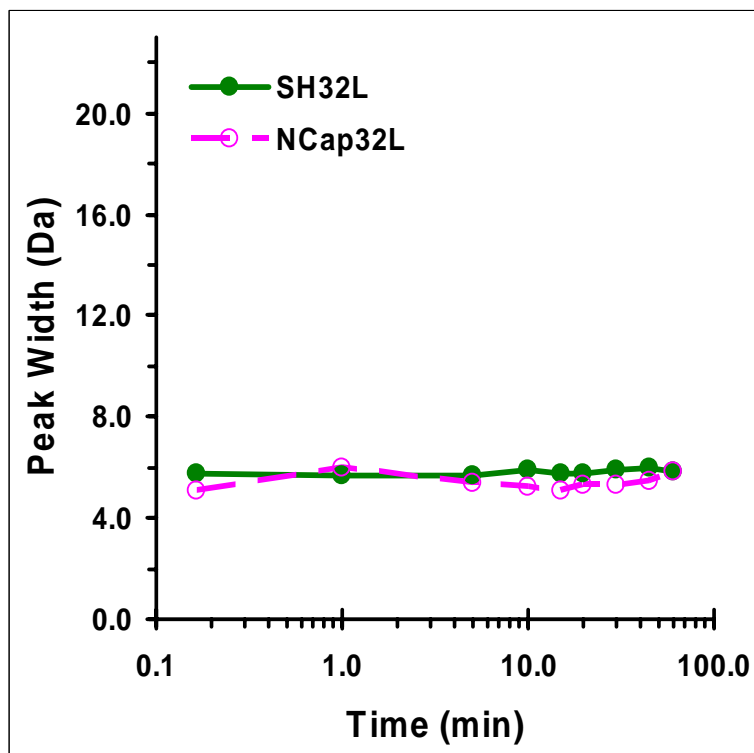

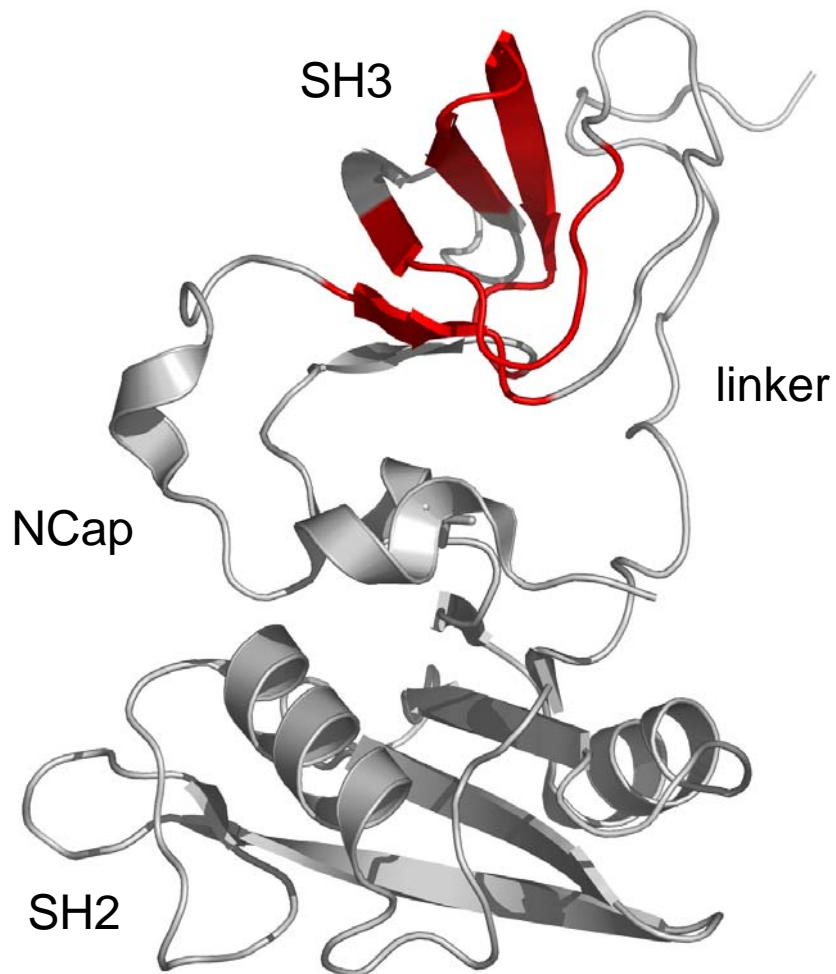

**Supplementary Figure 3s**

Mapping changing of dynamics in NCap32L. PDB code:2FO0. NCap mainly affects the dynamics of the red regions in SH3 domain. These regions include the reporter peptide, peptide b, and peptide d as in the supplementary peptide map (Figure 1s). See also Figure 1b, right, which is in the same orientation.
